# Supplementary material
Source: publisher figshare collection journal article supplement (https://sage.figshare.com/ndownloader/files/12778064)
Supplement: Supplementary file 1 [file 12778064]

**Appendix S1: Detailed decomposition of the differences between countries in mean (ln) earnings gaps between natives and Argentinian and Chilean immigrants who arrived during 1973–1985<sup>a</sup>**

|                                                                                   | Row                 | Men              |                  |                | Women            |                  |                |
|-----------------------------------------------------------------------------------|---------------------|------------------|------------------|----------------|------------------|------------------|----------------|
|                                                                                   |                     | SWE–USA          | SWE–IS           | USA–IS         | SWE–USA          | SWE–IS           | USA–IS         |
| <b>Total difference in differences between countries</b>                          | <b>1 (10+18)</b>    | <b>0.238***</b>  | <b>0.145**</b>   | <b>-0.093</b>  | 0.096**          | 0.132**          | 0.035          |
| Due to relative difference in natives' and immigrants' observed characteristics   | 2 (3+4+5+6+7)       | 0.101***         | 0.233***         | 0.131***       | -0.075**         | 0.208***         | 0.207***       |
| Due to relative difference in:                                                    |                     |                  |                  |                |                  |                  |                |
| Working hours                                                                     | 3                   | 0.055***         | 0.027***         | -0.008         | -0.108***        | -0.035           | 0.035*         |
| Marital status                                                                    | 4                   | 0.019***         | 0.030***         | 0.005          | -0.004***        | 0.002*           | 0.000          |
| Self-employment                                                                   | 5                   | -0.005***        | 0.001            | -0.001         | -0.009***        | 0.001            | 0.001          |
| Education levels                                                                  | 6                   | 0.009            | 0.141***         | 0.130***       | 0.028            | 0.198***         | 0.171***       |
| Work experience                                                                   | 7                   | 0.023***         | 0.034***         | 0.005          | 0.019***         | 0.041***         | 0.001          |
| Due to relative difference in unobserved characteristics                          | 8                   | 0.312***         | 0.152***         | -0.220***      | 0.224***         | 0.052            | -0.188***      |
| Total due to difference in mean group-specific                                    | 10 (2+8)            | 0.414***         | 0.385***         | -0.089         | 0.149***         | 0.260***         | 0.019          |
| Due to difference between the countries in returns to observed characteristics    | 11 (12+13+14+15+16) | -0.092***        | -0.082***        | 0.010*         | -0.017*          | -0.070***        | 0.022***       |
| Due to difference in returns to:                                                  |                     |                  |                  |                |                  |                  |                |
| Working hours                                                                     | 12                  | -0.022***        | -0.004**         | -0.002         | 0.053***         | 0.012***         | -0.002         |
| Marital status                                                                    | 13                  | -0.007***        | -0.012***        | 0.001          | -0.001           | -0.007***        | 0.000          |
| Self-employment                                                                   | 14                  | -0.048***        | -0.054***        | 0.002          | -0.013***        | -0.016***        | 0.006**        |
| Education levels                                                                  | 15                  | -0.008**         | -0.009           | 0.001          | -0.044***        | -0.045***        | -0.001         |
| Work experience                                                                   | 16                  | -0.006***        | -0.003           | 0.008***       | -0.013***        | -0.015***        | 0.019***       |
| Due to difference in returns to unobserved characteristics                        | 17                  | -0.084***        | -0.159***        | -0.015***      | -0.035***        | -0.058***        | -0.006**       |
| Total due to difference between the countries in market structure characteristics | 18 (11+17)          | -0.176***        | -0.240***        | -0.005         | -0.053***        | -0.128***        | 0.016***       |
| <b>Number of observations</b>                                                     |                     | <b>1,677,919</b> | <b>1,513,434</b> | <b>257,071</b> | <b>1,608,511</b> | <b>1,460,476</b> | <b>230,037</b> |

\*\*\* p<0.01, \*\* p<0.05, \* p<0.1

(Salaried and self-employed workers who worked for at least 5 hours per month, with positive earnings located in the ninety-ninth percentile and below the earnings distribution and aged 32–65 (Israel) and 27–65 (Sweden and the US); immigrants arrived in the destination at the age of 22 or older during 1973–1985.)

<sup>a</sup> The independent variables included in the earnings equations used for the decomposition are three categories of part-time employment and salaried worker indicators, age and its squared term, marital status, years of schooling, and academic degree.

**Appendix S2. Means of the variables used in the decompositions – Argentinian and Chilean immigrants and natives, men and women, in the US and Sweden (1990) and Israel (1995)**

| Variable            | <u>US</u>      |            | <u>Israel</u> |            | <u>Sweden</u>    |              |
|---------------------|----------------|------------|---------------|------------|------------------|--------------|
|                     | Native         | Immigrants | Native        | Immigrants | Native           | Immigrants   |
| <b><u>Man</u></b>   |                |            |               |            |                  |              |
| Ln wage             | 7.689          | 7.688      | 8.696         | 8.599      | 7.314            | 7.073        |
| Self-employment     | 0.060          | 0.067      | 0.214         | 0.201      | 0.038            | 0.014        |
| 35+ weekly hours    | 0.944          | 0.951      | 0.916         | 0.912      | 0.931            | 0.875        |
| 20-34 weekly hours  | 0.042          | 0.038      | 0.043         | 0.049      | 0.054            | 0.092        |
| 16-19 weekly hours  | 0.003          | 0.002      | 0.003         | 0.005      | 0.006            | 0.012        |
| 5-15 weekly hours   | 0.011          | 0.010      | 0.038         | 0.034      | 0.009            | 0.021        |
| Age                 | 41.699         | 43.381     | 42.066        | 48.598     | 43.281           | 42.019       |
| Age squared         | 1844.992       | 1954.804   | 1827.443      | 2425.647   | 1974.089         | 1822.324     |
| Married             | 0.745          | 0.769      | 0.899         | 0.941      | 0.618            | 0.548        |
| Years of schooling  | 13.061         | 12.982     | 12.936        | 14.603     | 9.860            | 9.680        |
| BA+ degree          | 0.256          | 0.279      | 0.236         | 0.353      | 0.133            | 0.131        |
| <i>N</i>            | <b>210,926</b> | <b>506</b> | <b>46,089</b> | <b>204</b> | <b>1,396,258</b> | <b>2,321</b> |
| <b><u>Women</u></b> |                |            |               |            |                  |              |
| Ln wage             | 7.130          | 7.079      | 8.091         | 8.075      | 6.927            | 6.780        |
| Self-employment     | 0.026          | 0.054      | 0.071         | 0.170      | 0.022            | 0.009        |
| 35+ weekly hours    | 0.755          | 0.778      | 0.531         | 0.625      | 0.560            | 0.747        |
| 20-34 weekly hours  | 0.176          | 0.159      | 0.358         | 0.270      | 0.383            | 0.199        |
| 16-19 weekly hours  | 0.018          | 0.002      | 0.024         | 0.025      | 0.032            | 0.017        |
| 5-15 weekly hours   | 0.050          | 0.061      | 0.087         | 0.080      | 0.026            | 0.036        |
| Age                 | 41.573         | 43.854     | 41.794        | 46.355     | 43.603           | 42.130       |
| Age squared         | 1831.260       | 1984.824   | 1798.868      | 2203.105   | 1998.562         | 1833.095     |
| Married             | 0.663          | 0.666      | 0.816         | 0.845      | 0.638            | 0.517        |
| Years of schooling  | 13.099         | 12.766     | 13.443        | 14.895     | 9.890            | 9.252        |
| BA+ degree          | 0.226          | 0.237      | 0.243         | 0.395      | 0.129            | 0.116        |
| <i>N</i>            | <b>188,879</b> | <b>410</b> | <b>40,801</b> | <b>200</b> | <b>1,336,058</b> | <b>2,006</b> |

Salaried and self-employed workers who worked for at least 5 hours per month, with positive earnings located in the ninety-ninth percentile and below the earnings distribution and aged 32–65 (Israel) and 27–65 (Sweden and the US); immigrants arrived in the destination at the age of 22 or older during 1973–1985.)
